# Supplementary material
Source: PubMed Central journal article supplement (PMC10338375)
Supplement: mmc1.pdf [file mmc1.pdf]

## **Supplementary Methods and Materials:**

### *1.1 Spp virus generation*

Spp virus was generated in Phoenix cells after being co-transfected by pLV-mCherry and pcDNA-Spike using a calcium phosphate kit (ThermoFisher, Waltham, MA, USA), which was previously reported [1]. The supernatant containing Spp virus was harvested 48 to 72-hours post transfection, clarified by centrifuging at 5,000 g for 15 min, followed by passing through 0.45 µm filter disk, and precipitated by ultracentrifuging at 24,000 rpm for 2 hours. The viral pellets were resuspended in cold PBS buffer, aliquoted, and stored at -80 °C before use. The viral particle number was determined using real time RT-PCR assay. Co-transfection of pLV-mCherry and pMD2.G vector carrying vesicular stomatitis virus glycoprotein (VSV-G) expression cassette were performed to obtain VSV-G lentivirus [1].

### *1.2 Real time RT-PCR, Western blot, and Immunostaining*

RNA extraction kit was obtained from Zymo Research (Irvine, CA, USA) and Qiagen (Hilden, Germany). The RT kit was obtained from Takara Bio USA (Mountain view, CA, USA). The SYBR green master mix was from Biorad (Hercules, CA, USA). For cDNA synthesis, RT reaction was carried out at 42°C for 2 hrs containing 1x RT buffer, 1.0~5 µg of total RNA, 0.5 mM dNTPs, 0.5 µg of oligo (dT) 15-mer primer, 20 units of RNasin, and 5 units of SMART Moloney murine leukemia virus reverse transcriptase. A combined index of three house-keeping genes beta-actin, Rps18 and Nono were used as controls to normalize the amplification data in real time PCR. The real time PCRs were performed as we previously reported [1]. For Western Blot assay, cellular proteins were extracted from hearts and other organs using RIPA lysis buffer (Santa Cruz Biotech., Inc., Dallas, TX, USA), separated by SDS-PAGE, followed by a transfer onto PVDF membranes. Primary antibodies were added and followed by HRP-labeled secondary antibodies. Images were acquired using a Bio-Rad Gel Imaging System (Hercules, CA, USA). GAPDH, beta-actin, and beta-tubulin were used as internal controls.

For immunostaining, hearts from mice were under snap freezing process and approximately 6 µm thick fresh sections were cut and collected. The sections were then fixed by 10% buffered formalin (Fisher Scientific, Pittsburgh, PA, USA), blocked with 5% donkey serum, and incubated in a humidified chamber overnight at 4°C with primary antibodies, followed by fluorescent conjugated secondary antibodies for 2 hours at room temperature. Images were acquired using ImageXpress Pico System (Molecular Device, San Jose, CA, USA) or confocal microscopy system (Carl Zeiss AG, Oberkochen, Germany).

### *1.3 Cardiac fibrosis staining*

The fibrosis in mouse hearts was evaluated using Masson's trichrome staining (#HT15-1KT, Millipore Sigma). Briefly, the heart cross sections were fixed by Formalin and stained in Weigert's iron hematoxylin working solution, followed by Biebrich scarlet-acid fuchsin solution, phosphomolybdic-phosphotungstic acid solution, and Acetic acid. The sections were dehydrated and mounted. The images were acquired using ImageXpress Pico System (Molecular Device, San Jose, CA, USA). Images from 5-8 sections (60x objective) per heart were analyzed using ImageJ software plug in Color deconvolution 2 and the percentage of fibrotic areas per section

was estimated (n=3 hearts per group). Mann-Whitney test was used to compare the difference among two groups.

### **Supplementary Discussions:**

Statins can upregulate the expression of SR-B1 [2], but such an effect seems unlikely to increase risk of SARS-CoV-2 infection since viral entry can be mitigated by lowering cholesterol levels and altering membrane lipid rafts by statins. Indeed, the use of statins does not alter the SARS-CoV-2 infection in patients [3]. Furthermore, many retrospective observational studies have shown that statin therapy can reduce the risk of severity and mortality and improve prognosis in hospitalized patients with COVID-19 [4, 5]. Mechanistically, statins can attenuate SARS-CoV-2 replication *via* main protease and RNA-dependent RNA polymerase, reduce inflammation, improve endothelial function, decrease risk of thrombosis, and alleviate pulmonary fibrosis in patients with COVID-19 [6, 7]. However, the statin-related side effects such as increase in risk of diabetes may worsen the outcome in inpatients with type 2 diabetes, e.g., elevating COVID-19 related mortality [8].

Pathophysiological mechanisms perpetuating CVD sequelae of PASC are yet to be determined. Both acute and chronic cardiac injuries secondary to SARS-CoV-2 infection are thought to be involved [9]. SARS-CoV-2 virus has been detected in the heart tissue in autopsy studies [10]. Acute infection of SARS-CoV-2 can cause microvascular and myocardial injuries, including endothelialitis, microthrombi, and altered renin-angiotensin homeostasis [11, 12]. In an animal model, SARS-CoV-2 infection results in cardiac pericyte loss, fibrosis, cardiomyocyte hypertrophy, and diastolic dysfunction in hamster [13]. The Spike protein alone can damage cardiac pericytes function [14]. In this study, long-term transcriptomic suppression of mitochondria related respiratory genes are revealed after a transient (one time) exposure of the replication-incompetent Spp virus which viral particles are cleared in 3~4 days after administration in obese mice. This data suggests that potential mitochondria malfunction, probably caused by obese-induced inflammatory responses and subsequently exacerbated by viral infections, is a contributor to the long-term cardiac sequelae in COVID-19 patients. The transition from acute cardiac illnesses to chronic phase in PASC may be possibly explained by several putative mechanisms. First is the chronic inflammatory response evoked by SARS-CoV-2 infection or integration of the SARS-CoV-2 genome into host DNA, which can induce a continuous activation of immune-inflammatory cascades and results in persistent endothelial dysfunction and cardiomyopathy [15]. Second, autoimmune antibodies against cardiac antigens are elicited through molecular mimicry in COVID-19, which may contribute to the delayed damages [16].

It has been well established that obesity with impaired storage of fat in adipose tissue forces non-adipose tissues, such as the heart, to keep the excess fat, a phenomenon referred to as ectopic fat deposition, which is usually toxic to the non-adipose tissue, i.e. lipotoxicity, leading to obesity-related complications, such as vasculopathy and cardiomyopathy [17, 18]. It is reasonable to posit that SARS-CoV-2 infection interplays thus exacerbates obesity-related cardiac comorbidities. In this study, we have identified upregulations of clusters of genes involving stress signaling, glucose metabolism, and cardiovascular functions. (1) NFE2L1 is a master transcription factor that regulate expression of all the proteasome subunit genes during stress response [19].

Other upregulated DEs with functional characteristics of inflammatory and kinase activity included GBAS, MFN2, GNA12, PI4KB, PIP4K2B, C3, and GIT1. For example, GBAS is localized to mitochondria and plays a role in oxidative phosphorylation and vesicular transport; it can facilitate NF- $\kappa$ B-mediated cytokine production [20]. *MFN2* is a GTPase embedded in the outer membrane of the mitochondria, involving mitochondria fusion and mitophagy [21]. (2) Genes involve in glucose metabolisms, such as *OGDH*, *OGDHL*, *PYGB*, and *GYS1*. *OGDHL* is a rate-limiting enzyme in the Krebs cycle that is pivotal in mitochondrial metabolism [22]. *PYGB* regulates glycogen mobilization [23]. Under normal conditions, main source of cardiac ATP is from fatty acid oxidation (FAO), but less from glucose metabolism. With mitochondria dysfunction or metabolic perturbations, cardiac metabolic profiles are impaired by reduction in FAO and concomitant increases in glucose utilization [24, 25]. (3) Gene clusters engage in cardiovascular functions. *SCN5A* is a tetrodotoxin-resistant voltage-gated sodium channel subunit and primarily expressed in cardiac muscle for the action potential initiation in an electrocardiogram [26]. *SLC6A6* is a sodium and chloride ion-dependent taurine neurotransmitter transporter, which deficiency leads to cardiomyopathy [27]. *SCARA5* has a function in scavenger receptor activity and ferritin receptor activity, which genetic locus is associated with the susceptibility to venous thromboembolism [28]. *PER1* is a member of the Period family of genes for circadian rhythms, which can regulate cardiovascular rhythm centrally (through brain) and peripherally (in the heart) [29-31]. The upregulation of *PER1* is probably due to the long-term stress or chronic inflammatory consequence in HDF mice after viral administration. *PCSK6* is upregulated in human atherosclerotic plaques associated with smooth muscle cells (SMCs); it induces SMC migration and modulates vascular remodeling [32]. These data demonstrate that long-term chronic inflammations persist in HFD mice after viral administration, leading to cardiac metabolic and functional perturbations.

The Spp virus is a replication-incompetent virus. The dosage administered in this study is supraphysiological. The viral burdens were detected in the heart, the liver, kidneys, spleen (around 29~35 Ct values in a real time RT-PCR assay) and lungs (26~30 Ct values) at 2 hpi. At 24 hpi, the Spp virus was hardly detectable in these tissues (33~36 Ct values or negative). Therefore, the viral particles were rapidly and effectively removed from the body. The residual viral burdens retained in the tissues at 2 hpi were in the pathological ranges from the nasal and pharyngeal swab samples in patients (overall median (interquartile range) Ct value: 28.7 (23.9–33.4)) [33]. Our data reflects parts of pathological spectra of PASC. Firstly, exposure of replication-incompetent Spp virus is transient and one time. The viral particles are rapidly cleared and undetectable 3~4 dpi in mice, which can be equivalent to the “viral-free” stage in discharged COVID-19 patients. The timelines from 6 to 24 wpi in this animal model is long enough to mimic potential cardiac sequelae in PASC in patients. Secondly, obesity is associated with and contributes to PASC [34-36]. Our data has demonstrated that cholesterol facilitates viral uptake in host cells and heart is the vulnerable organ for viral accumulation under obesity. Lastly and more importantly, the cardiac functional impairments and fibrotic development have been revealed as long-term sequelae in this model.

The first case series about persistent symptoms after acute COVID-19 was reported in July 2020 in an Italian hospitalized cohort [37], which was posited to be caused by the Wuhan original strain before the Alpha variant emerged to be the dominant variant in the world until January 2021 [38]. Different variants of SARS-CoV-2 may

lead to different clinical aspects of PASC. For example, patients infected by the Wuhan variant showed higher incidences of dyspnea than those infected with Alpha or Delta variant [39]. Another report shows that Wuhan variant causes higher occurrences of dysgeusia and anosmia as compared to the Alpha variant in patients [40]. Patients infected by the Omicron variant were less likely to experience PASC than those infected by the delta variant with an odds ratio ranging from 0.24 (0.20–0.32) to 0.50 (0.43–0.59) [41]. It could be expected that PASC from individuals infected with the Wuhan variant would lead to higher burden and health costs than those infected by other variants [39]. The underlying explanations could be as follows. First, the Darwinian evolution of the mutations of Spike protein has led to less pathogenicity but higher transmissibility among VOCs [42, 43]. The Wuhan variant exhibited the highest pathogenicity which led to higher fatalities and likely PASC as well. Second, administration of antiviral medications, e.g., remdesivir, can reduce the risk of PASC [44]. Third, vaccination can reduce PASC [45]. These selective pressures reflected and contributed to the viral evolution and its adaption to a new host.

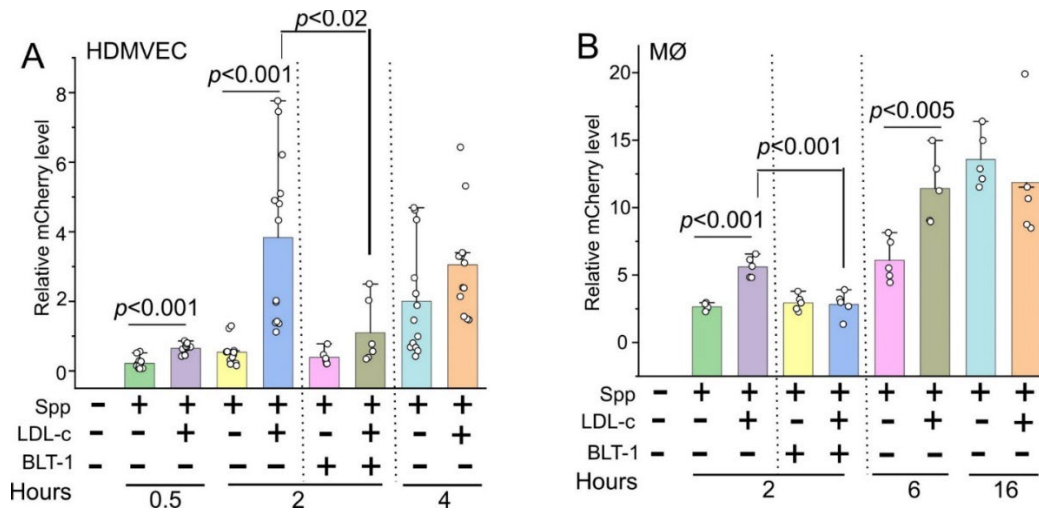

**Supplementary Fig 1** LDL-c significantly increases cellular uptake of Spp virus in HDMVEC (A) at 0.5 and 2 hpi and in MØ (B) at 2 and 6 hpi, which can be blocked with BLT-1, an inhibitor of SR-B1.

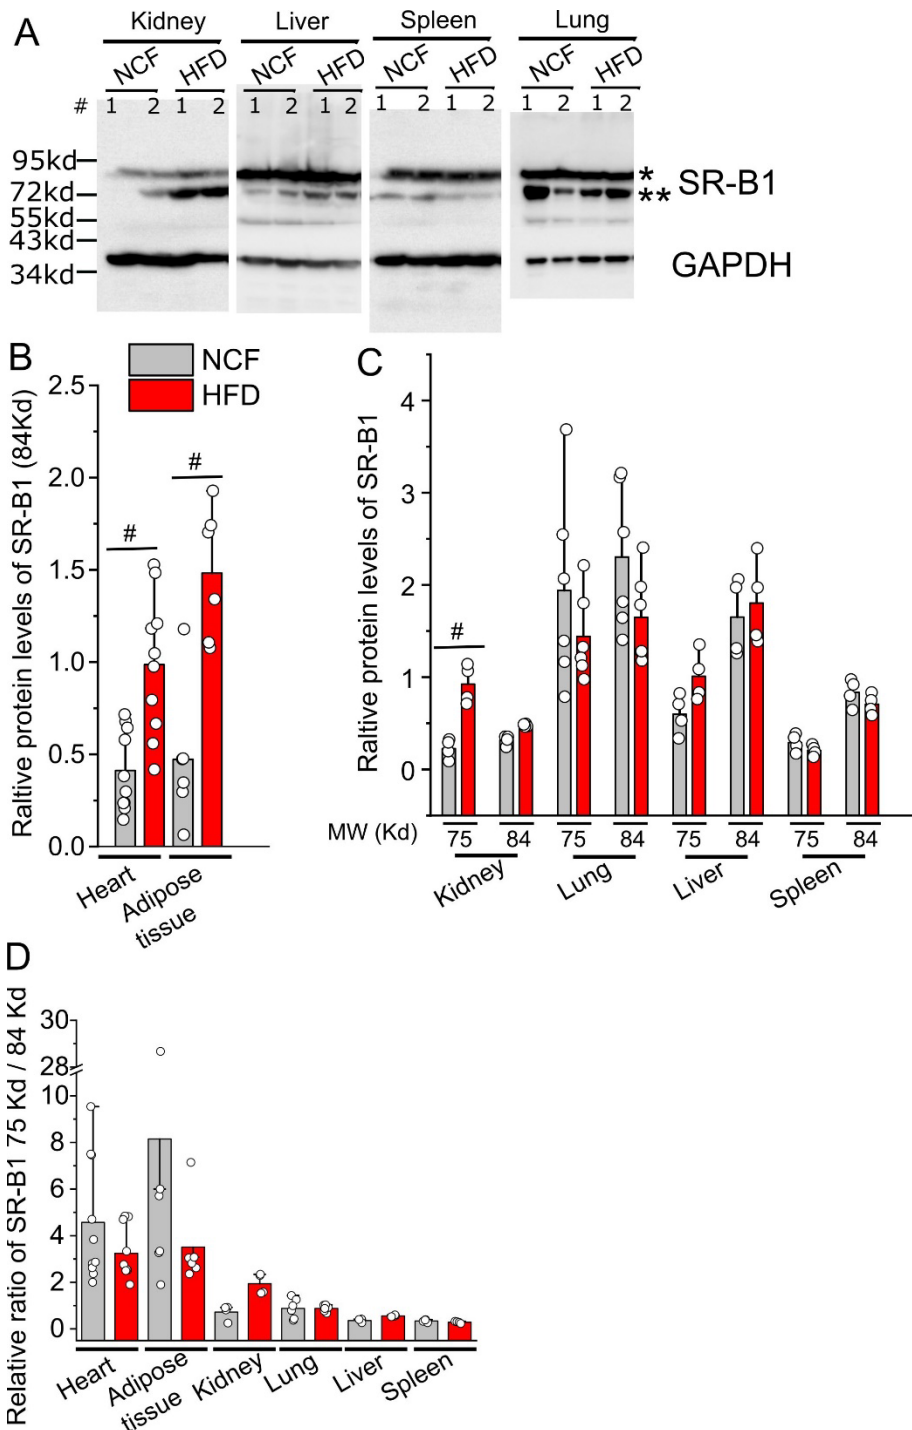

**Supplementary Fig 2** (A) The relative protein levels of SR-B1 in kidney, liver, spleen, and lungs in HFD mice and the NCF group by Western blot. Blots from two animals per group were shown. SR-B1 shows two bands in the blots, 75Kd (\*\*) and 84Kd (\*), probably due to the distinct post-translational modifications. (B) Relative protein levels of SR-B1 with the 84Kd MW band in hearts and adipose tissues. (C) Relative protein levels of SR-B1 in kidney, liver, spleen, and lungs. (D) Relative ratios of SR-B1 75Kd / 84 Kd MW bands among various tissues. # indicates  $p < 0.01$  in HFD vs NCF group for SR-B1. The data from aorta is absent due to the very limited tissue collected.

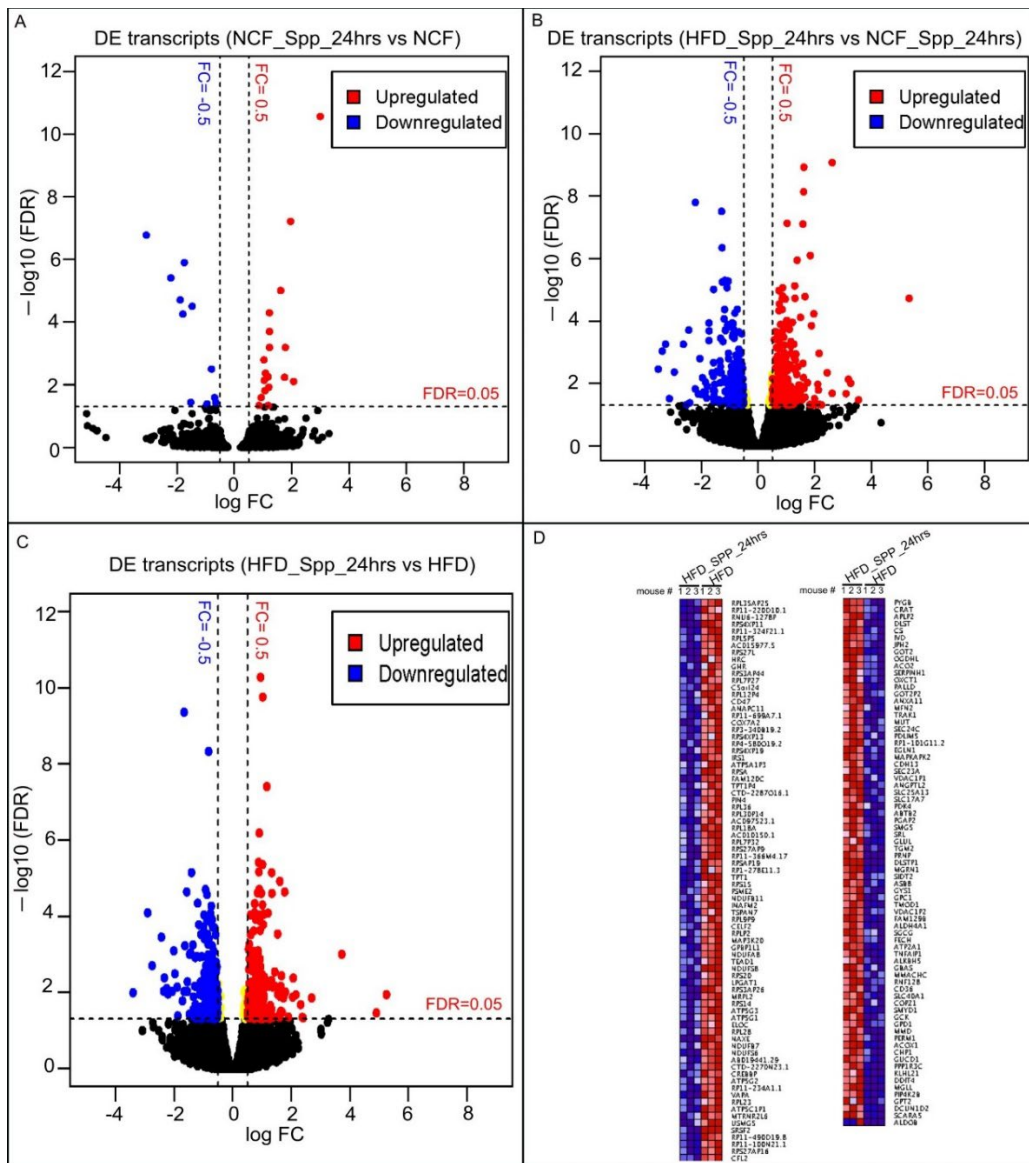

**Supplementary Fig 3** Acute changes in cardiac transcriptomes in normal and obese mice 24 hpi. (A) Volcano plot showing the cardiac DEs in NCF mice 24 hpi as compared with control NCF mice without viral administration. (B) Volcano plot showing the cardiac DEs of 24 hpi in HFD mice as compared with NCF mice. (C) Volcano plot showing the cardiac DEs in HFD mice 24 hpi as compared with HFD control mice. (D) Ranked heatmap showing the individual downregulated (left panel) and upregulated DEs (right panel), which is ranked by FDR in HFD mice 24 hpi as compared with HFD control mice. FDR < 0.05 (horizontal dashed line) is used for cut-off threshold. Right vertical dashed line: fold changes (FC) > 0.5 (increase); left vertical dashed line: FC < - 0.5 (decrease). Blue dots represent downregulated DEs and red dots represent upregulated DEs.

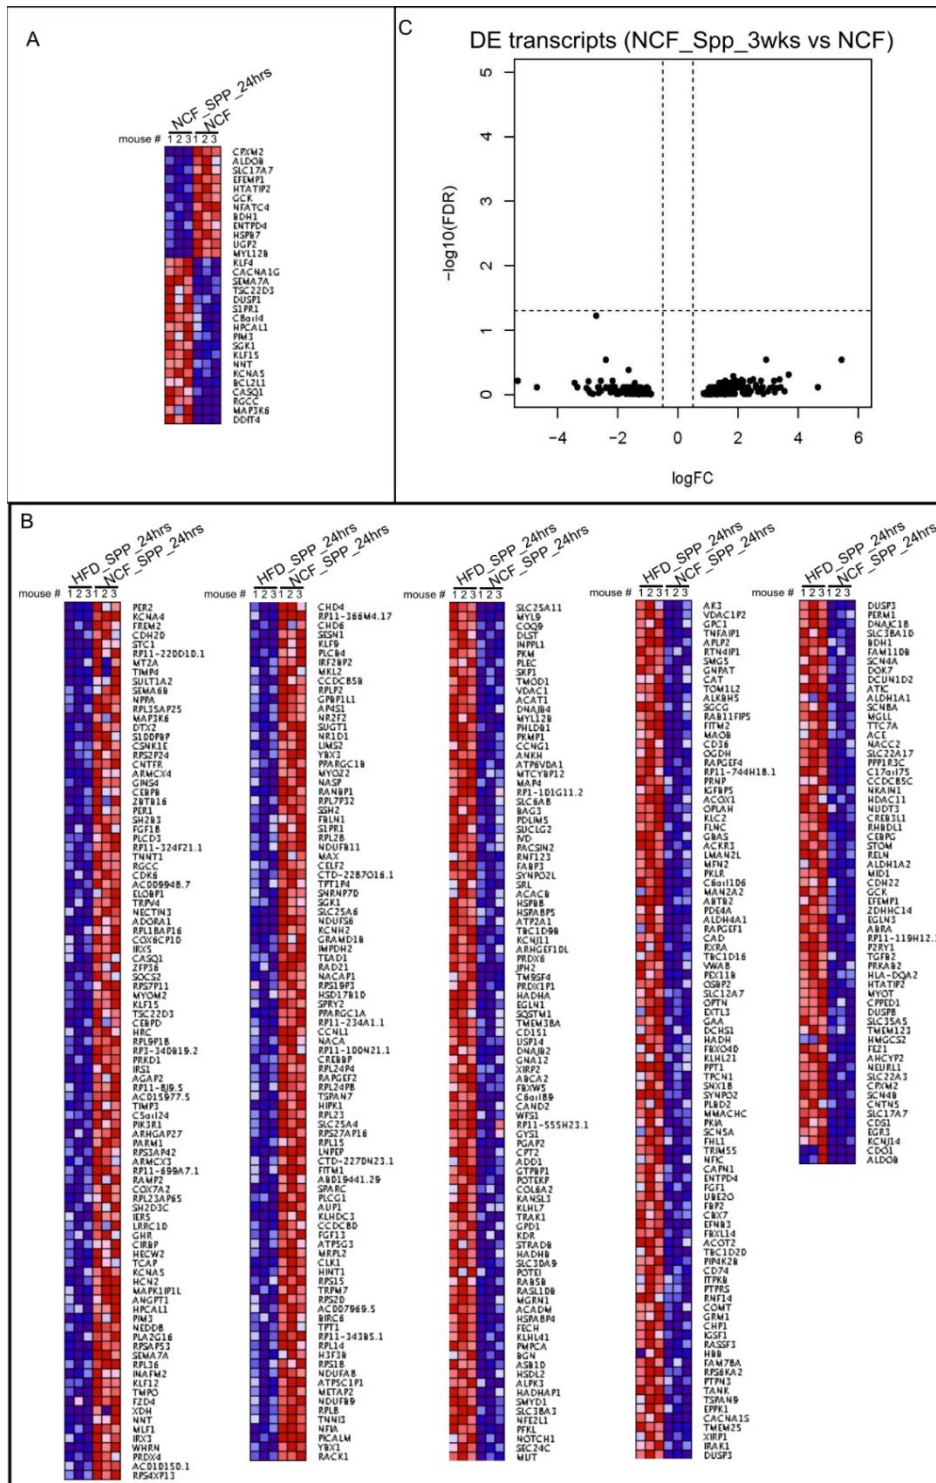

**Supplementary Fig 4** (A) Ranked heatmap showing the individual dysregulated DEs, which is ranked by FDR in NCF mice 24 hpi as compared with NCF control mice. (B) Ranked heatmap showing the individual dysregulated DEs, which is ranked by FDR in HFD mice 24 hpi as compared with NCF mice 24 hpi. (C) Volcano plot showing that there is no significant cardiac DEs in NCF mice 3 wpi as compared with control NCF mice without viral administration.



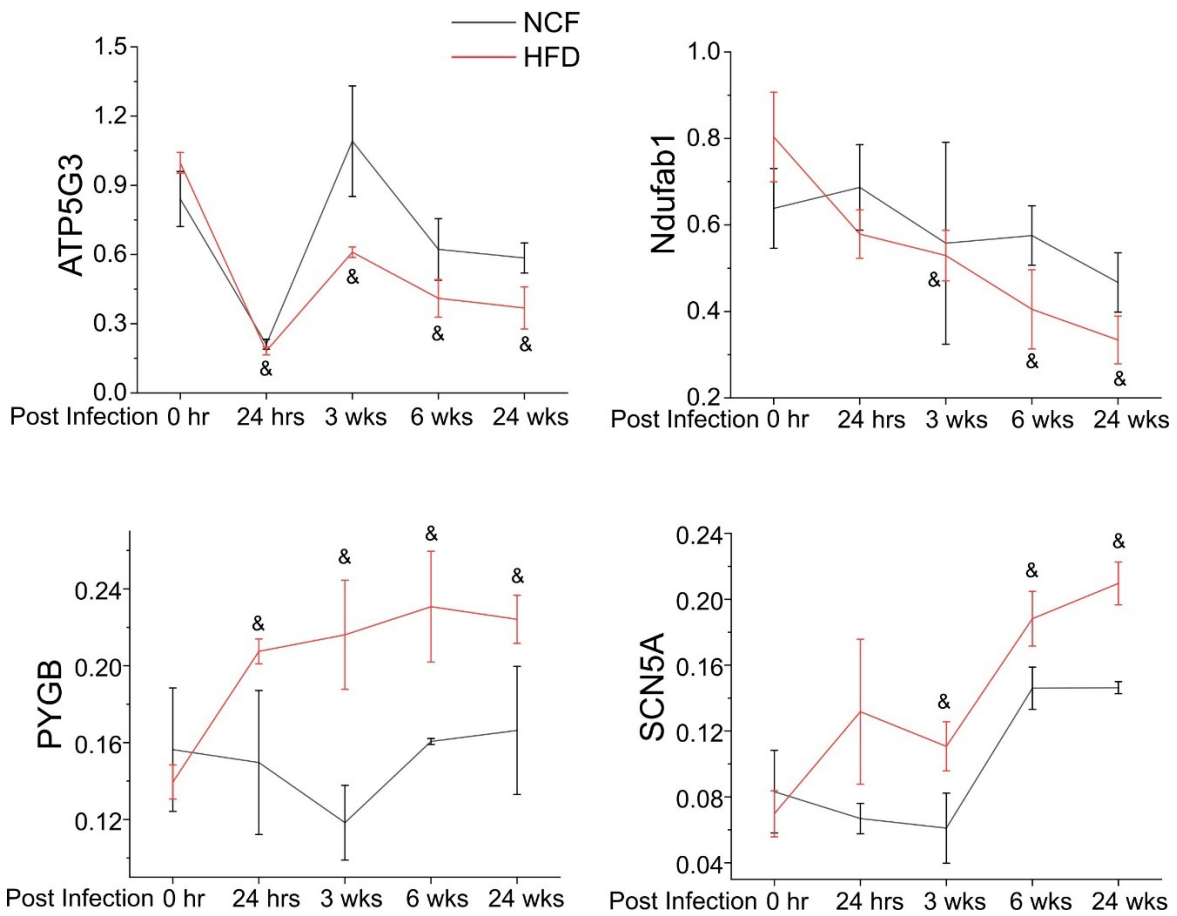

**Supplementary Fig 5** Relative changes of some representative cardiac transcripts of DEs in HFD mice during the time course of post viral administration. & indicates  $p < 0.05$  at each post-administration time point as compared to before administration (0 hr) in HFD mice.

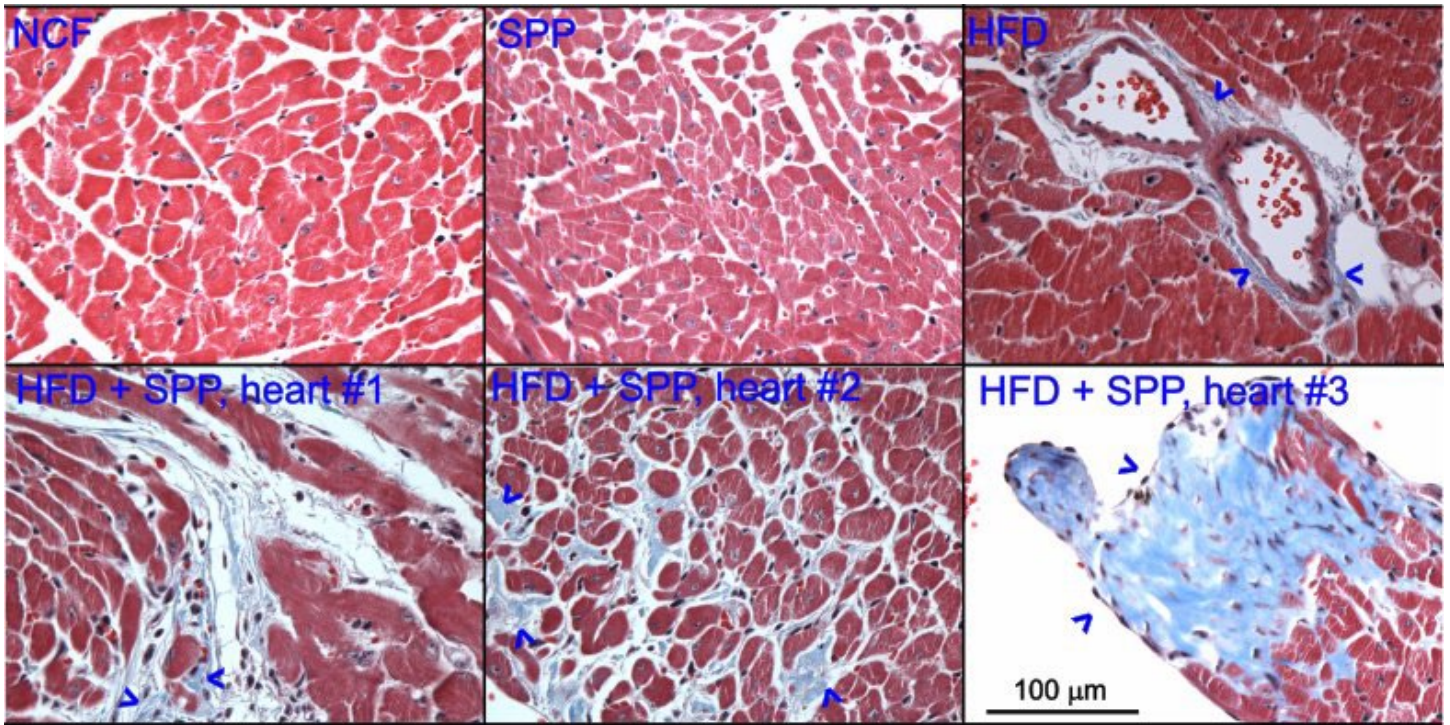

**Supplementary Fig 6** Heart cross section showing the cardiac fibrosis using Masson's trichrome staining. Focal fibrosis was evident in all three examined hearts in the HFD+SPP group but not in the control groups (6 wpi).



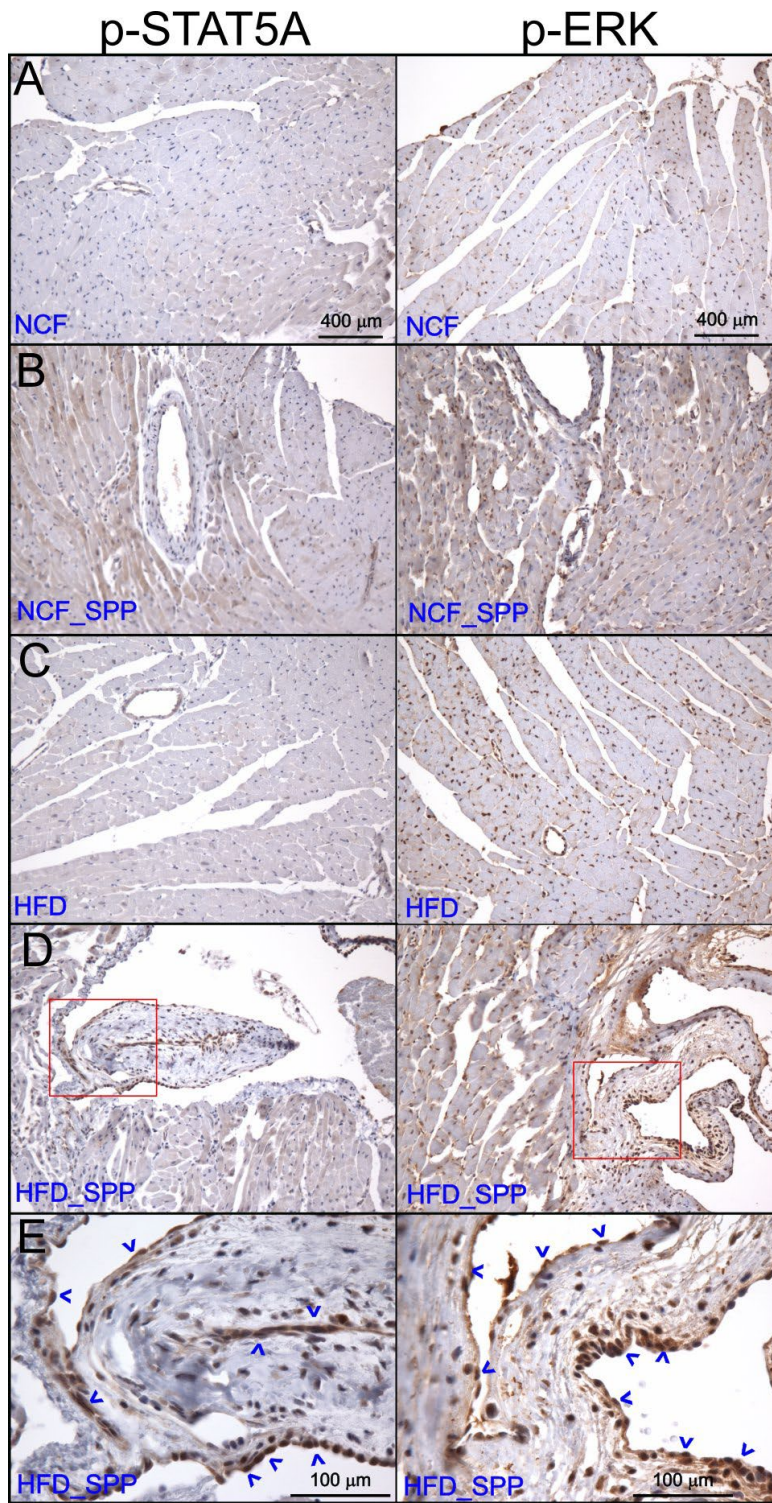

**Supplementary Fig 7** IHC staining on heart sections (6 wpi) using p-STAT5A and p-ERK antibodies. The boxed areas in (D) were shown in a higher magnification in (E). The arrow heads indicate the positive cells in the focal fibrotic regions.

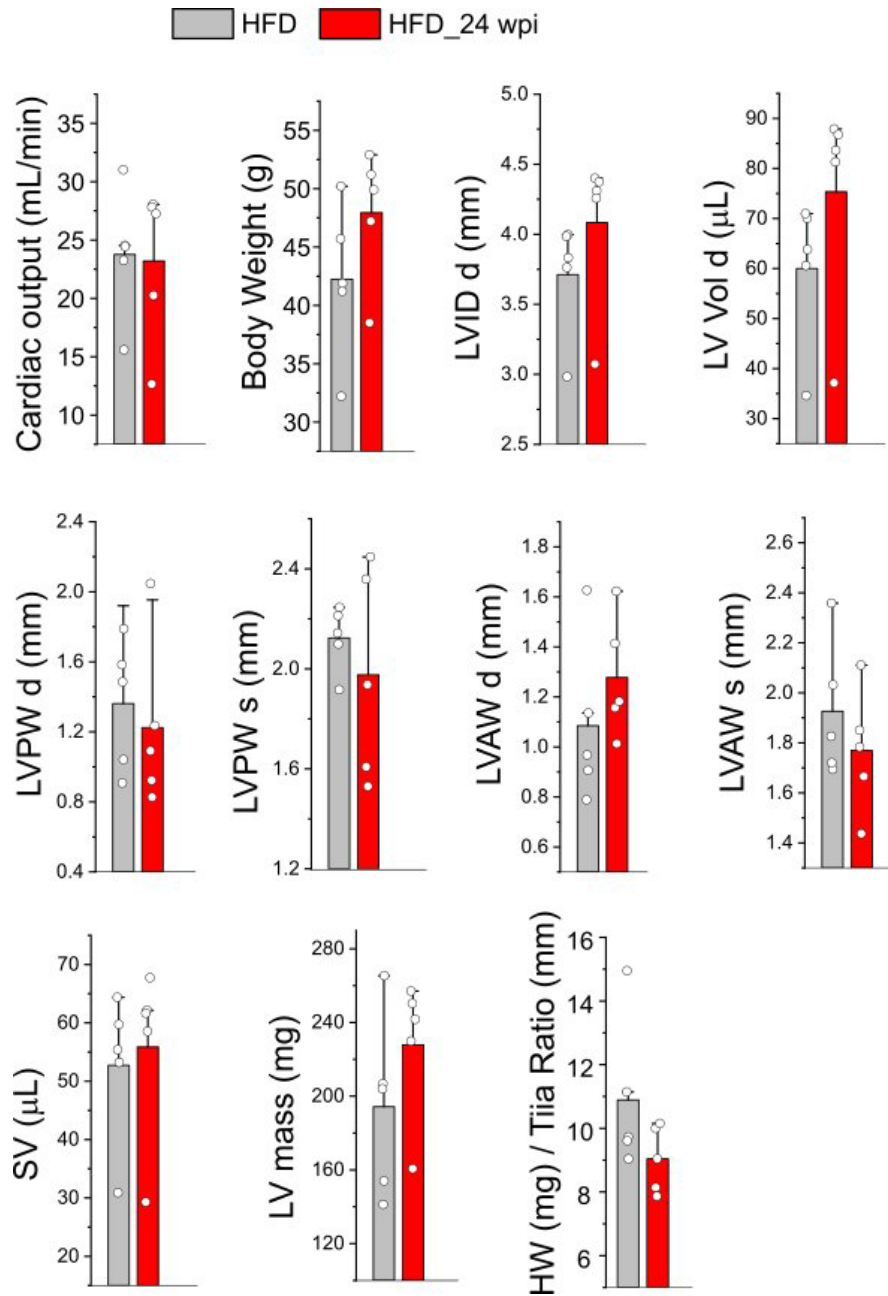

**Supplementary Fig 8** Echocardiogram showing the cardiac functions in the HFD mice 24 wpi as compared with the age-matched HFD controls (13 months old). There were no significant in cardiac output (mL/min), body weight (g) left ventricular end-diastolic diameter (LVID d), left ventricular end-diastolic volume (LV Vol d), left ventricular end-diastolic posterior wall thickness (LVPW d), left ventricular end-systolic posterior wall thickness (LVPW s), left ventricular end-diastolic anterior wall thickness (LVAW d), left ventricular end-systolic anterior wall thickness (LVAW s), and stroke volume (SV), LV mass, and heart weight-to-tibia length.

### Supplementary table 1 Source of antibodies in this study

| Antibodies       | Catalog   | Vendor             | Dilutions for WB or IHC |
|------------------|-----------|--------------------|-------------------------|
| Spike S1 subunit | GTX635671 | Genetex            | 1:100 (IHC)             |
| MRC1             | A02285-2  | Boster Bio         | 1:200 (IHC)             |
| SR-B1            | NB400-104 | Novus Biologicals  | 1:2000                  |
| CD31             | ZRB1216   | Sigma              | 1:200 (IHC)             |
| STAT5            | A21228    | Abclonal           | 1:1000                  |
| GAPDH            | G8795     | Sigma              | 1:2000                  |
| Beta-actin       | A1978     | Sigma              | 1:2000                  |
| Beta-tubulin     | MA1-118   | Thermofisher       | 1:2000                  |
| PYGB             | A13539    | Abclonal           | 1:1000                  |
| OGDH             | A6391     | Abclonal           | 1:1000                  |
| NDUFS3           | A8013     | Abclonal           | 1:1000                  |
| NDUFA2           | A8136     | Abclonal           | 1:1000                  |
| ATP5C1           | A15257    | Abclonal           | 1:1000                  |
| p-STAT5A         | AP0758    | Abclonal           | 1:200 (IHC)             |
| p-ERK            | sc-7383   | Santa Cruz Biotech | 1:200 (IHC)             |

### Supplementary table 2 List of primers

| species | ENSEMBL            | SYMBOL  | ENTREZID | 5 primers                | 3 primers             | size |
|---------|--------------------|---------|----------|--------------------------|-----------------------|------|
| mouse   | ENSMUSG00000038717 | Atp5l   | 27425    | TAGCCAACAATGCCACGTTT     | TTACAGTTAAGGAAGCTGTG  | 100  |
| mouse   | ENSMUSG00000018770 | Atp5g3  | 228033   | CTCTCCAGTCCTAGTCTCTG     | GGAGAGAGGAAGCGGGAGA   | 188  |
| mouse   | ENSMUSG00000014294 | Ndufa2  | 17991    | TTCAGGCTTTGCCGCTTAGC     | TGCTTTTGGCCAAGAGAAGA  | 93   |
| mouse   | ENSMUSG00000030869 | Ndufab1 | 70316    | CAAGACATACAGAACTCGGT     | GCTCGCGCAGGTGCCTGGA   | 103  |
| mouse   | ENSMUSG00000038615 | Nfe2l1  | 18023    | AAGCTCTCCCCAGTCTCTCC     | CATCGCCAGAAGGAGCAGG   | 131  |
| mouse   | ENSMUSG00000032511 | Scn5a   | 20271    | ACTTTCACCTTGGTCCAGTAC    | CCGAAGGGGACCTGCCTCT   | 100  |
| mouse   | ENSMUSG00000033059 | Pygb    | 110078   | AAGGAGAGTGCCTGTGCATAG    | GAGGGGTTCTCTGCCCA     | 102  |
| mouse   | ENSMUSG00000020893 | Per1    | 18626    | ATTAGTCAGCCCTCAGAGACA    | CGAAACAGGGGAAGGTGAAGA | 98   |
| mouse   | ENSMUSG00000020456 | Ogdh    | 18293    | GACATTTTCACAAAACAAACCAGC | TGGGATTCTCCAACCAGGC   | 146  |

### Supplementary table 3 Cardiac DEs for NCF\_Spp\_24hrs vs NCF\_CTL

| Ensembl ID      | Gene symbol | NCF_Spp_24hrs-1 | NCF_Spp_24hrs-2 | NCF_Spp_24hrs-3 | NCF-CTL-1   | NCF-CTL-2   | NCF-CTL-3   | logFC    | logCPM   | PValue   | FDR      |
|-----------------|-------------|-----------------|-----------------|-----------------|-------------|-------------|-------------|----------|----------|----------|----------|
| ENSG00000121898 | CPXM2       | 8.421097163     | 4.817468434     | 5.424727771     | 61.68102601 | 53.21796724 | 49.97904554 | -3.13309 | 4.983498 | 4.00E-29 | 4.55E-25 |
| ENSG00000168209 | DDIT4       | 29.00600134     | 17.34288636     | 30.57573835     | 3.304340679 | 3.130468661 | 3.010785876 | 2.992887 | 3.944127 | 4.77E-15 | 2.72E-11 |
| ENSG00000102760 | RGCC        | 37.4270985      | 27.45957007     | 27.61679593     | 8.44442618  | 8.34791643  | 6.623728927 | 1.958697 | 4.347837 | 1.60E-11 | 6.09E-08 |
| ENSG00000136872 | ALDOB       | 4.678387313     | 0.481746843     | 2.958942421     | 26.43472543 | 30.26119706 | 12.64530068 | -3.07241 | 3.814489 | 5.89E-11 | 1.68E-07 |
| ENSG00000106633 | GCK         | 20.11706544     | 9.634936868     | 15.78102624     | 60.94672808 | 52.17447769 | 39.14021639 | -1.74582 | 5.093367 | 5.53E-10 | 1.26E-06 |
| ENSG00000104888 | SLC17A7     | 3.74270985      | 6.744455808     | 8.876827262     | 25.33327854 | 43.30481648 | 21.67765831 | -2.21594 | 4.259694 | 2.05E-09 | 3.89E-06 |
| ENSG00000130037 | KCNA5       | 27.60248514     | 34.68577273     | 28.109953       | 9.913022037 | 12.00012987 | 7.225886103 | 1.613798 | 4.388355 | 6.01E-09 | 9.79E-06 |
| ENSG00000115380 | EFEMP1      | 6.081903506     | 3.372227904     | 4.931570701     | 19.82604407 | 16.69583286 | 16.86040091 | -1.88824 | 3.622241 | 1.37E-08 | 1.96E-05 |
| ENSG00000161267 | BDH1        | 72.98284208     | 53.95564646     | 32.05520956     | 167.7870767 | 121.0447882 | 152.9479225 | -1.47294 | 6.660341 | 2.47E-08 | 3.12E-05 |
| ENSG00000118515 | SGK1        | 112.2812955     | 83.82395075     | 77.42566001     | 34.14485368 | 42.7830717  | 40.94668791 | 1.221889 | 6.049223 | 4.43E-08 | 5.05E-05 |
| ENSG00000109854 | HTATIP2     | 4.210548581     | 7.707949495     | 8.383670192     | 24.59898061 | 28.17421795 | 17.46255808 | -1.7966  | 4.01015  | 5.34E-08 | 5.53E-05 |
| ENSG00000163884 | KLF15       | 54.73713156     | 47.6929375      | 60.16516255     | 18.35744822 | 24.52200451 | 27.69923006 | 1.22443  | 5.312901 | 2.12E-07 | 0.000201 |
| ENSG00000143318 | CASQ1       | 29.00600134     | 24.56908901     | 14.7947121      | 9.545873073 | 4.695702992 | 4.817257402 | 1.77733  | 3.972161 | 7.83E-07 | 0.000644 |
| ENSG00000112992 | NNT         | 404.6805025     | 396.4776521     | 625.3231649     | 256.6371261 | 209.2196555 | 142.7112505 | 1.225113 | 8.410991 | 7.92E-07 | 0.000644 |
| ENSG00000138623 | SEMA7A      | 65.49742238     | 68.88979861     | 54.74043478     | 32.67625783 | 26.08723884 | 33.72080181 | 1.0298   | 5.583611 | 2.12E-06 | 0.001608 |
| ENSG00000173641 | HSPB7       | 431.8151489     | 346.8577273     | 398.4709126     | 678.4912861 | 742.9645622 | 624.4369907 | -0.79747 | 9.07175  | 4.44E-06 | 0.003159 |
| ENSG00000170989 | S1PR1       | 62.22255126     | 47.6929375      | 61.64463376     | 34.14485368 | 20.3480463  | 25.29060136 | 1.083737 | 5.426704 | 6.44E-06 | 0.004316 |
| ENSG00000176907 | C8orf4      | 43.50900201     | 36.6127601      | 34.52099491     | 23.13038475 | 13.04361942 | 13.24745785 | 1.173706 | 4.833394 | 8.86E-06 | 0.00561  |
| ENSG00000171552 | BCL2L1      | 14.9708394      | 13.97065846     | 30.08258128     | 6.975830323 | 4.173958215 | 6.021571752 | 1.748689 | 3.773847 | 9.69E-06 | 0.005811 |
| ENSG00000157514 | TSC22D3     | 258.2469797     | 137.2978504     | 182.4681159     | 86.64715559 | 88.17486729 | 107.1839772 | 1.038157 | 7.173171 | 1.28E-05 | 0.007267 |
| ENSG00000142733 | MAP3K6      | 14.50300067     | 8.189696338     | 29.09626714     | 4.772936537 | 3.652213438 | 3.612943051 | 2.065179 | 3.537283 | 1.45E-05 | 0.007881 |
| ENSG00000198355 | PIM3        | 56.60848648     | 36.6127601      | 62.6309479      | 27.90332129 | 25.04374929 | 13.84961503 | 1.197181 | 5.257605 | 2.31E-05 | 0.01198  |
| ENSG00000120129 | DUSP1       | 94.03558498     | 58.29136805     | 95.17931453     | 40.38638608 | 49.04400902 | 28.30138724 | 1.064609 | 5.953111 | 3.14E-05 | 0.015572 |
| ENSG00000169764 | UGP2        | 391.5810181     | 336.2592967     | 343.2373208     | 621.9503456 | 518.6143082 | 585.8989315 | -0.689   | 8.868002 | 5.63E-05 | 0.025688 |
| ENSG00000006283 | CACNA1G     | 38.36277596     | 46.72944381     | 51.28833529     | 22.02893786 | 27.1307284  | 22.27981548 | 0.933805 | 5.153478 | 5.64E-05 | 0.025688 |
| ENSG00000118680 | MYL12B      | 282.1067549     | 290.0115997     | 290.4695143     | 489.7767184 | 426.7872275 | 435.3596377 | -0.6491  | 8.531725 | 8.53E-05 | 0.036289 |
| ENSG00000100968 | NFATC4      | 3.274871119     | 4.335721591     | 2.958942421     | 8.811575144 | 11.47838509 | 10.83882915 | -1.52216 | 2.969313 | 8.60E-05 | 0.036289 |
| ENSG00000197217 | ENTPD4      | 32.28087246     | 22.64210164     | 36.00046612     | 70.85975012 | 57.39192545 | 46.96825967 | -0.95579 | 5.508345 | 0.000101 | 0.040953 |
| ENSG00000136826 | KLF4        | 46.78387313     | 53.47389962     | 60.16516255     | 26.06757647 | 34.43515527 | 28.30138724 | 0.858013 | 5.408414 | 0.000117 | 0.045944 |
| ENSG00000115756 | HPCAL1      | 18.71354925     | 20.23336742     | 27.61679593     | 13.21736272 | 8.34791643  | 6.623728927 | 1.182163 | 4.077938 | 0.000121 | 0.04603  |













|                 |               |             |             |             |             |             |             |           |         |         |         |
|-----------------|---------------|-------------|-------------|-------------|-------------|-------------|-------------|-----------|---------|---------|---------|
| ENSG00000147684 | NDUFB9        | 314.2104676 | 239.0929155 | 284.9308333 | 369.6890633 | 377.7969971 | 395.8692702 | -0.446174 | 8.37296 | 0.00152 | 0.04243 |
| ENSG00000169122 | FAM110B       | 12.12087857 | 9.108301545 | 8.10778794  | 3.396093758 | 5.973075053 | 2.550704061 | 1.299298  | 2.98038 | 0.00152 | 0.04243 |
| ENSG00000130957 | FBP2          | 13.98562912 | 11.95464578 | 15.63644817 | 8.247656269 | 4.479806289 | 7.652112182 | 1.020713  | 3.49406 | 0.00152 | 0.04243 |
| ENSG00000238193 | RP11-555H23.: | 601.8482399 | 580.6542235 | 589.5520088 | 300.3117194 | 294.1739463 | 532.0768671 | 0.65378   | 8.9185  | 0.00154 | 0.04301 |
| ENSG00000121691 | CAT           | 139.3901036 | 148.5791689 | 229.9137009 | 101.8828127 | 68.6903631  | 133.6568928 | 0.765927  | 7.10423 | 0.00155 | 0.04314 |
| ENSG00000099901 | RANBP1        | 16.31656731 | 15.9395277  | 14.47819275 | 26.68359381 | 27.87435025 | 22.95633655 | -0.724822 | 4.45056 | 0.00157 | 0.04347 |
| ENSG00000178996 | SNX18         | 13.98562912 | 22.77075386 | 16.21557588 | 7.762500018 | 10.45288134 | 8.672393807 | 0.963164  | 3.82331 | 0.00161 | 0.04439 |
| ENSG00000159314 | ARHGAP27      | 4.661876374 | 7.969763851 | 5.21214939  | 10.67343752 | 12.44390636 | 14.79408355 | -1.092904 | 3.37382 | 0.00161 | 0.04447 |
| ENSG00000231500 | RPS18         | 292.7658363 | 245.3548729 | 324.8906453 | 408.9867197 | 356.8912344 | 428.5182822 | -0.468633 | 8.42662 | 0.00162 | 0.04447 |
| ENSG00000184216 | IRAK1         | 7.925189836 | 9.677570391 | 12.74080962 | 4.851562511 | 2.488781272 | 5.101408121 | 1.258654  | 3.00285 | 0.00169 | 0.04624 |
| ENSG00000082146 | STRADB        | 49.8820772  | 31.87905541 | 45.17196138 | 25.22812506 | 24.39005646 | 29.07802629 | 0.695853  | 5.14036 | 0.00169 | 0.04624 |
| ENSG00000074964 | ARHGEF10L     | 72.2590838  | 63.18884197 | 67.75794207 | 42.6937501  | 34.84293781 | 56.11548934 | 0.607172  | 5.83446 | 0.00171 | 0.04653 |
| ENSG00000092439 | TRPM7         | 59.20582995 | 69.45079928 | 62.54579268 | 82.96171894 | 100.5467634 | 88.76450131 | -0.512015 | 6.2921  | 0.00171 | 0.04653 |
| ENSG00000174804 | FZD4          | 10.25612802 | 19.92440963 | 9.84517107  | 25.71328131 | 22.8967877  | 24.9968998  | -0.888379 | 4.32437 | 0.00172 | 0.04653 |
| ENSG00000238181 | AHCYP2        | 2.797125825 | 4.554150772 | 4.63302168  | 1.455468753 | 0.497756254 | 0.510140812 | 2.158903  | 1.74607 | 0.00172 | 0.04653 |
| ENSG00000237541 | HLA-DQA2      | 5.128064012 | 7.969763851 | 5.21214939  | 0           | 2.488781272 | 2.550704061 | 1.82849   | 2.26897 | 0.00176 | 0.04754 |
| ENSG00000146535 | GNA12         | 48.94970193 | 68.88153043 | 53.85887703 | 36.38671883 | 31.35864403 | 42.85182822 | 0.629831  | 5.57994 | 0.00176 | 0.04754 |
| ENSG00000166317 | SYNPO2L       | 47.55113902 | 48.38785196 | 53.27974932 | 35.90156258 | 29.36761901 | 34.68957523 | 0.574481  | 5.40629 | 0.00177 | 0.04754 |
| ENSG00000125148 | MT2A          | 0.466187637 | 1.138537693 | 6.37040481  | 28.13906256 | 2.488781272 | 14.79408355 | -2.518458 | 3.33248 | 0.00179 | 0.04798 |
| ENSG00000156298 | TSPAN7        | 44.28782556 | 33.58686195 | 37.06417344 | 53.85234387 | 54.25543173 | 64.78788314 | -0.579605 | 5.62019 | 0.0018  | 0.04822 |
| ENSG00000158125 | XDH           | 37.29501099 | 34.72539964 | 35.32679031 | 65.4960939  | 35.83845032 | 97.43689512 | -0.885829 | 5.70648 | 0.0018  | 0.04822 |
| ENSG00000244734 | HBB           | 193.4678695 | 401.9038057 | 854.7925    | 196.4882817 | 237.4297333 | 228.5430838 | 1.129364  | 8.45936 | 0.00181 | 0.04828 |
| ENSG00000065978 | YBX1          | 972.001224  | 879.5203679 | 871.0080758 | 1104.700784 | 1227.466923 | 1194.749782 | -0.373003 | 10.0262 | 0.00183 | 0.04873 |
| ENSG00000107954 | NEURL1        | 3.263313462 | 2.846344233 | 4.05389397  | 0.485156251 | 0.497756254 | 1.020281624 | 2.241317  | 1.58827 | 0.00184 | 0.04882 |
| ENSG00000204628 | RACK1         | 643.3389396 | 578.9464169 | 644.5691412 | 788.378908  | 782.4728319 | 846.8337482 | -0.372696 | 9.48233 | 0.00186 | 0.04914 |
| ENSG00000088682 | COQ9          | 324.000408  | 302.2817575 | 272.1900237 | 230.9343755 | 203.582308  | 234.1546328 | 0.427234  | 8.03432 | 0.00186 | 0.04914 |
| ENSG00000076555 | ACACB         | 180.4146157 | 277.8031971 | 255.9744478 | 162.0421879 | 128.9188699 | 183.6506924 | 0.58748   | 7.63466 | 0.00187 | 0.04921 |
| ENSG00000196834 | POTEI         | 59.20582995 | 38.14101272 | 60.80840955 | 39.29765634 | 31.35864403 | 26.52732223 | 0.702694  | 5.44407 | 0.00187 | 0.04929 |
| ENSG00000103381 | CPPED1        | 4.195688737 | 5.123419619 | 6.94953252  | 0.485156251 | 2.986537526 | 0.510140812 | 1.964836  | 2.10541 | 0.00191 | 0.04998 |
| ENSG00000100307 | CBX7          | 14.45181676 | 9.677570391 | 13.31993733 | 4.851562511 | 6.470831307 | 7.14197137  | 1.026294  | 3.36526 | 0.00191 | 0.04998 |
| ENSG00000186260 | MKL2          | 20.04606841 | 11.95464578 | 17.3738313  | 31.53515632 | 32.85191279 | 21.93605492 | -0.793411 | 4.57587 | 0.00191 | 0.04998 |

















|                 |            |             |             |             |             |             |          |          |          |         |         |
|-----------------|------------|-------------|-------------|-------------|-------------|-------------|----------|----------|----------|---------|---------|
| ENSG00000146677 | AC004453.8 | 216.328958  | 133.3521521 | 190.3250995 | 231.234207  | 261.5353334 | 306.8003 | -0.56347 | 7.809407 | 0.00214 | 0.04614 |
| ENSG00000126432 | PRDX5      | 188.3711902 | 145.6788217 | 147.5874274 | 236.4146068 | 211.8113317 | 211.7503 | -0.45207 | 7.580959 | 0.00215 | 0.04625 |
| ENSG00000170791 | CHCHD7     | 15.1246941  | 12.88697269 | 19.37441132 | 22.1344353  | 32.93407902 | 26.93083 | -0.77703 | 4.485252 | 0.00216 | 0.04636 |
| ENSG00000120333 | MRPS14     | 28.87441601 | 28.01515801 | 32.48063075 | 41.91414343 | 51.66130042 | 42.24444 | -0.59609 | 5.263194 | 0.00217 | 0.04651 |
| ENSG00000049283 | EPN3       | 12.37474972 | 10.08545688 | 11.39671254 | 5.18039975  | 5.811896297 | 5.808611 | 1.016922 | 3.25609  | 0.00218 | 0.04666 |
| ENSG00000100644 | HIF1A      | 37.12424916 | 36.41970542 | 41.02816516 | 53.2168338  | 57.47319671 | 54.91778 | -0.52966 | 5.574337 | 0.00221 | 0.04709 |
| ENSG00000157184 | CPT2       | 60.04045234 | 58.27152866 | 55.27405584 | 30.61145307 | 43.91210536 | 42.7725  | 0.578669 | 5.629583 | 0.00221 | 0.04709 |
| ENSG00000254502 | FNTAL1     | 17.41631442 | 14.00757901 | 14.24589068 | 9.889854069 | 7.103428807 | 6.864722 | 0.921887 | 3.676712 | 0.00222 | 0.0471  |
| ENSG00000204899 | MZT1       | 10.54145346 | 10.08545688 | 8.547534408 | 4.238508887 | 5.166130042 | 4.224444 | 1.109273 | 3.04099  | 0.00222 | 0.0471  |
| ENSG00000171992 | SYNPO      | 42.62413792 | 39.78152438 | 68.95011089 | 34.37901652 | 20.66452017 | 32.21139 | 0.774835 | 5.355175 | 0.00222 | 0.0471  |
| ENSG00000122679 | RAMP3      | 2.749944382 | 2.801515801 | 3.98884939  | 0           | 1.29153251  | 0.528056 | 2.405516 | 1.549346 | 0.00223 | 0.04718 |
| ENSG00000197358 | BNIP3P1    | 43.08246198 | 57.15092234 | 63.82159025 | 26.84388961 | 46.49517038 | 22.70639 | 0.784877 | 5.462181 | 0.00224 | 0.04718 |
| ENSG00000196154 | S100A4     | 11.91642565 | 8.404547404 | 11.96654817 | 17.42498098 | 20.01875391 | 20.06611 | -0.81516 | 3.997487 | 0.00225 | 0.04732 |
| ENSG00000112972 | HMGCS1     | 23.83285131 | 39.78152438 | 27.92194573 | 17.89592641 | 20.66452017 | 13.20139 | 0.821212 | 4.633917 | 0.00227 | 0.04777 |
| ENSG00000116750 | UCHL5      | 25.2078235  | 17.92970113 | 21.08391821 | 32.4952348  | 33.57984527 | 35.90778 | -0.65355 | 4.846604 | 0.00229 | 0.04809 |
| ENSG00000234152 | ELOBP1     | 3.208268446 | 4.482425282 | 2.849178136 | 8.006072341 | 10.33226008 | 7.392777 | -1.26011 | 2.811037 | 0.00231 | 0.04829 |
| ENSG00000131828 | PDHA1      | 395.0753429 | 446.0013155 | 352.7282532 | 297.6375129 | 323.5288939 | 266.14   | 0.429188 | 8.442572 | 0.00232 | 0.04859 |
| ENSG00000168334 | XIRP1      | 27.04111976 | 67.79668239 | 43.30750767 | 31.0823985  | 12.9153251  | 23.23444 | 1.013546 | 5.142104 | 0.00234 | 0.04888 |
| ENSG00000196735 | HLA-DQA1   | 19.70793474 | 19.61061061 | 15.95539756 | 32.02428937 | 27.76794897 | 28.515   | -0.67471 | 4.645685 | 0.00234 | 0.04881 |
| ENSG00000248746 | ACTN3      | 25.66614756 | 28.57546117 | 27.92194573 | 16.48309011 | 20.01875391 | 13.20139 | 0.733267 | 4.522845 | 0.00235 | 0.04888 |
| ENSG00000188612 | SUMO2      | 176.9130886 | 172.5733734 | 120.2353173 | 185.5525001 | 248.6200083 | 257.163  | -0.55358 | 7.602867 | 0.00236 | 0.04896 |
| ENSG00000106299 | WASL       | 21.99955505 | 21.85182325 | 33.05046638 | 44.73981602 | 39.39174157 | 37.49194 | -0.67249 | 5.091107 | 0.00237 | 0.04903 |
| ENSG00000111196 | MAGOHB     | 10.0831294  | 5.603031602 | 5.698356272 | 13.65741752 | 21.31028642 | 11.61722 | -1.06851 | 3.616405 | 0.00239 | 0.04946 |
| ENSG00000141562 | NARF       | 11.45810159 | 15.68848849 | 8.547534408 | 3.296618023 | 8.394961318 | 3.696389 | 1.259524 | 3.248421 | 0.0024  | 0.04951 |
| ENSG00000108829 | LRRCS9     | 16.49966629 | 15.12818533 | 21.08391821 | 9.418908637 | 12.26955885 | 5.280555 | 0.979562 | 3.836825 | 0.00243 | 0.04998 |





|                 |             |             |             |             |             |            |            |             |             |          |          |
|-----------------|-------------|-------------|-------------|-------------|-------------|------------|------------|-------------|-------------|----------|----------|
| ENSG00000213619 | NDUF53      | 506.9295589 | 475.5288907 | 471.0438823 | 662.3854829 | 641.648576 | 667.328931 | -0.43985658 | 9.159050649 | 0.000538 | 0.037803 |
| ENSG00000216938 | RPL7P58     | 3.011462726 | 1.796143119 | 5.159297725 | 12.22286909 | 7.63867352 | 8.37432384 | -1.52970093 | 2.873285988 | 0.000539 | 0.037803 |
| ENSG00000125730 | C3          | 22.58597045 | 24.24793211 | 19.60533136 | 15.04353119 | 10.8214542 | 7.8509286  | 0.9635675   | 4.164919699 | 0.000552 | 0.038261 |
| ENSG00000107262 | BAG1        | 59.72734407 | 59.7217587  | 58.81599407 | 91.20140786 | 81.4791842 | 91.594167  | -0.570351   | 6.222491058 | 0.000552 | 0.038261 |
| ENSG00000175920 | DOK7        | 8.532477724 | 13.02203761 | 10.83452522 | 3.290772449 | 5.09244901 | 4.71055716 | 1.32547065  | 3.123184757 | 0.000571 | 0.039117 |
| ENSG00000218175 | AC016739.2  | 142.0406586 | 197.1267073 | 171.8046143 | 238.8160577 | 241.891328 | 271.642129 | -0.55690822 | 7.723983145 | 0.000575 | 0.039117 |
| ENSG00000117707 | PROX1       | 76.79229951 | 61.9669376  | 59.33192384 | 93.08184926 | 98.6661996 | 106.772629 | -0.59119145 | 6.385000058 | 0.000575 | 0.039117 |
| ENSG00000197879 | MYO1C       | 84.82286678 | 105.5234082 | 95.96293769 | 64.87522827 | 57.9266075 | 67.5179859 | 0.58658373  | 6.334999884 | 0.000582 | 0.039376 |
| ENSG00000189186 | DCAF8L2     | 9.536298632 | 10.77685871 | 4.12743818  | 1.880441399 | 2.54622451 | 2.6169762  | 1.79364923  | 2.68224042  | 0.000589 | 0.039388 |
| ENSG00000205981 | DNAJC19     | 73.78083679 | 69.60054586 | 66.03901089 | 92.61173891 | 103.758649 | 116.193743 | -0.57573334 | 6.45609217  | 0.000592 | 0.039388 |
| ENSG00000204564 | C6orf136    | 24.09170181 | 22.90082477 | 24.76462908 | 36.19849693 | 34.3740308 | 54.9565002 | -0.81012027 | 5.077646108 | 0.000593 | 0.039388 |
| ENSG00000117643 | MAN1C1      | 19.07259726 | 17.96143119 | 21.66905045 | 13.16308979 | 6.36556127 | 9.42111432 | 0.9772114   | 3.986244112 | 0.000612 | 0.04026  |
| ENSG00000215464 | AP000354.2  | 16.56304499 | 22.00275321 | 13.93010386 | 27.73651064 | 35.6471431 | 30.8803191 | -0.82408064 | 4.659069341 | 0.000621 | 0.04026  |
| ENSG00000179988 | PSTK        | 8.030567269 | 7.184572476 | 8.770806133 | 15.98375189 | 14.0042348 | 17.7954382 | -1.00188922 | 3.687611638 | 0.000622 | 0.04026  |
| ENSG00000075415 | SLC25A3     | 2527.621048 | 2417.608638 | 2598.738264 | 3280.900131 | 3509.33393 | 3301.57717 | -0.41974265 | 11.521633   | 0.000625 | 0.04026  |
| ENSG00000185088 | RPS27L      | 3.011462726 | 7.633608255 | 8.254876361 | 11.75275874 | 14.6407909 | 19.3656239 | -1.25867786 | 3.540222934 | 0.000625 | 0.04026  |
| ENSG00000172586 | CHCHD1      | 31.11844817 | 36.82093394 | 27.34427795 | 52.65235918 | 44.5589289 | 56.5266859 | -0.68947006 | 5.408636354 | 0.000627 | 0.04026  |
| ENSG00000070087 | PFN2        | 72.77701588 | 63.76308072 | 62.94343225 | 96.84273206 | 108.851098 | 91.0707717 | -0.57001583 | 6.382966584 | 0.000635 | 0.040527 |
| ENSG00000219470 | RP3-337H4.6 | 128.4890763 | 162.5509523 | 108.861182  | 208.7289953 | 187.147501 | 206.217724 | -0.58888104 | 7.391950521 | 0.000641 | 0.04067  |
| ENSG00000108262 | GIT1        | 64.74644861 | 74.09090365 | 61.39564293 | 44.66048323 | 40.7395921 | 45.0119906 | 0.6167973   | 5.817058334 | 0.000654 | 0.041031 |
| ENSG00000159592 | GPBP1L1     | 51.69677768 | 35.4738266  | 61.91157271 | 76.15787667 | 77.6598474 | 88.4537955 | -0.70576038 | 6.043648306 | 0.000656 | 0.041031 |
| ENSG00000204396 | VWA7        | 8.030567269 | 8.082644035 | 11.350455   | 4.701103498 | 1.90966838 | 3.14037144 | 1.41907234  | 2.879189326 | 0.000657 | 0.041031 |
| ENSG00000254112 | KB-1205A7.1 | 40.15283635 | 38.61707706 | 40.75845203 | 47.48114533 | 68.7480617 | 85.8368193 | -0.75315283 | 5.762440475 | 0.00067  | 0.041565 |
| ENSG00000149428 | HYOU1       | 37.14137362 | 43.55647063 | 39.21066271 | 28.20662099 | 20.369796  | 23.5527858 | 0.72040604  | 5.057357629 | 0.000673 | 0.041565 |
| ENSG00000182446 | NPOC4       | 38.64710498 | 30.9834688  | 59.33192384 | 27.26640029 | 21.0063522 | 19.3656239 | 0.91716635  | 5.08446979  | 0.000686 | 0.042115 |
| ENSG00000139112 | GABARAPL1   | 60.73116498 | 66.4572954  | 71.71423838 | 41.83982113 | 41.3761482 | 46.5821763 | 0.61354409  | 5.806823229 | 0.00069  | 0.042115 |
| ENSG00000168273 | SMIM4       | 41.15665726 | 53.88429357 | 34.05136499 | 59.70401442 | 75.7501791 | 74.8455193 | -0.69341236 | 5.841643152 | 0.000724 | 0.043951 |
| ENSG00000105953 | OGDH        | 1653.794947 | 1258.198255 | 1815.55687  | 1209.59393  | 863.170108 | 1041.55653 | 0.60140969  | 10.35346778 | 0.000752 | 0.045416 |
| ENSG00000137692 | DCUN1D5     | 81.81140406 | 73.19283209 | 79.45318497 | 104.3644977 | 121.58222  | 114.623558 | -0.53646259 | 6.593624491 | 0.000756 | 0.045416 |
| ENSG00000134531 | EMP1        | 16.06113454 | 22.45178899 | 18.05754204 | 39.95937973 | 29.9181379 | 29.3101334 | -0.81067416 | 4.75237932  | 0.000764 | 0.045652 |
| ENSG00000163382 | NAXE        | 53.20250816 | 43.10743485 | 55.20448566 | 78.03831807 | 77.0232913 | 73.2753336 | -0.59486411 | 6.002594267 | 0.000778 | 0.046291 |
| ENSG00000075886 | TUBA3D      | 1.505731363 | 8.082644035 | 4.12743818  | 9.402206996 | 14.0042348 | 15.178462  | -1.44422322 | 3.259256868 | 0.000787 | 0.046566 |
| ENSG00000180957 | PITPNB      | 31.62035862 | 35.4738266  | 39.72659249 | 19.74463469 | 22.2794644 | 22.5059953 | 0.72943383  | 4.892287901 | 0.000796 | 0.046807 |
| ENSG00000082641 | NFE2L1      | 750.3561292 | 738.2148219 | 758.4167656 | 561.781868  | 543.618932 | 575.734764 | 0.41819655  | 9.357307316 | 0.000799 | 0.046807 |
| ENSG00000143393 | PI4KB       | 52.70059771 | 46.25068531 | 57.78413453 | 33.37783484 | 38.1933676 | 23.0293906 | 0.7326639   | 5.425524463 | 0.000809 | 0.047152 |
| ENSG00000141562 | NARF        | 10.03820909 | 11.67493027 | 16.50975272 | 3.290772449 | 8.27522965 | 3.66376668 | 1.36823765  | 3.313212792 | 0.000824 | 0.047539 |
| ENSG00000197852 | FAM212B     | 5.019104543 | 7.184572476 | 8.254876361 | 2.350551749 | 1.90966838 | 2.09358096 | 1.64472908  | 2.482246996 | 0.000824 | 0.047539 |
| ENSG00000163735 | CXCL5       | 4.517194089 | 4.041322018 | 3.611508408 | 6.581544897 | 14.0042348 | 11.5146953 | -1.35631957 | 3.027057639 | 0.000839 | 0.048154 |
| ENSG00000185834 | RPL12P4     | 11.04203    | 20.65564587 | 11.86638477 | 27.73651064 | 28.6450257 | 25.6463667 | -0.89413473 | 4.448623019 | 0.000846 | 0.048304 |
| ENSG00000087302 | C14orf166   | 127.9871659 | 126.1790541 | 120.211637  | 173.9408294 | 169.32393  | 178.477777 | -0.47891567 | 7.231035144 | 0.000856 | 0.048485 |
| ENSG00000165629 | ATP5C1      | 695.1459793 | 636.2836999 | 673.8042829 | 886.6281197 | 1043.95205 | 841.09615  | -0.46646015 | 9.63811376  | 0.000858 | 0.048485 |
| ENSG00000230807 | AC099535.4  | 3.51337318  | 2.245178899 | 3.611508408 | 7.991875946 | 7.00211739 | 9.94450956 | -1.41888377 | 2.734025581 | 0.000877 | 0.049319 |
| ENSG00000121898 | CPXM2       | 36.63946317 | 36.82093394 | 35.08322453 | 17.39408294 | 23.5525767 | 24.5995763 | 0.7377722   | 4.913529666 | 0.000883 | 0.049411 |
| ENSG00000204220 | PFDN6       | 13.55158227 | 19.30853853 | 11.350455   | 30.08706239 | 30.5546941 | 21.9826001 | -0.88566101 | 4.460860419 | 0.000897 | 0.049941 |
| ENSG00000159388 | BTG2        | 19.57450772 | 18.85950275 | 12.89824431 | 8.461986296 | 9.5483419  | 7.32753336 | 1.02674819  | 3.801256386 | 0.000905 | 0.049948 |
| ENSG00000142733 | MAP3K6      | 6.022925452 | 11.22589449 | 11.86638477 | 1.880441399 | 3.18278063 | 5.2339524  | 1.49852777  | 2.944952804 | 0.000913 | 0.049948 |
| ENSG00000175390 | EIF3F       | 24.59361226 | 30.53443302 | 26.82834817 | 44.66048323 | 42.0127044 | 42.9184097 | -0.65814678 | 5.176790818 | 0.000914 | 0.049948 |
| ENSG00000170035 | UBE2E3      | 109.9183895 | 89.80715594 | 100.6063056 | 148.5548705 | 135.586455 | 144.980481 | -0.51764844 | 6.936010385 | 0.000918 | 0.049948 |
| ENSG00000150527 | CTAGE5      | 18.57068681 | 20.65564587 | 22.18498022 | 31.96750379 | 35.6471431 | 33.4972953 | -0.71359477 | 4.802861986 | 0.000919 | 0.049948 |

**Supplementary Table 7 Prediction of Stat5-regulated targeted genes in this study from the existing Cistromes data [46-49]**

| Target gene    | Biosamples                   | MASC2 binding score        | MASC2 Q value | DOI (Signaling Pathways Project Datasets)* | Ref  |
|----------------|------------------------------|----------------------------|---------------|--------------------------------------------|------|
| ATP5C1         | B lymphocytes, GM12878 cells | 185                        | 1< E-05       | 10.1621/WdnDiLYKWM                         | [46] |
| ATP5G3         | Fibroblasts, MEFs            | 142                        | 1< E-05       | 10.1621/xXhMIGXpPo                         | [47] |
|                | Mammary gland                | 159                        | 1< E-05       | 10.1621/w9eiy79IrX                         | [48] |
|                | myeloblasts, K562 cells      | 176                        | 1< E-05       | 10.1621/WdnDiLYKWM                         | [46] |
| ATP5L          | Mammary gland                | 85, 92                     | 1< E-05       | 10.1621/w9eiy79IrX                         | [48] |
| ATP5MK (USMG5) | B lymphocytes, GM12878 cells | 162                        | 1< E-05       | 10.1621/WdnDiLYKWM                         | [46] |
| NDUFA2         | B lymphocytes, GM12878 cells | 121                        | 1< E-05       | 10.1621/WdnDiLYKWM                         | [46] |
|                | myeloblasts, K562 cells      | 1319                       | 1< E-05       | 10.1621/WdnDiLYKWM                         | [46] |
|                | T lymphocytes, CD4+          | 95, 119                    | 1< E-05       | 10.1621/ISZJ58eZyg                         | [49] |
|                | Mammary gland                | 106, 164, 176,             | 1< E-05       | 10.1621/w9eiy79IrX                         | [48] |
| NDUFAB1        | Fibroblasts, MEFs            | 374                        | 1< E-05       | 10.1621/xXhMIGXpPo                         | [47] |
|                | myeloblasts, K562 cells      | 139                        | 1< E-05       | 10.1621/WdnDiLYKWM                         | [46] |
|                | B lymphocytes, GM12878 cells | 174                        | 1< E-05       | 10.1621/WdnDiLYKWM                         | [46] |
|                | Fibroblasts, MEFs            | 145                        | 1< E-05       | 10.1621/xXhMIGXpPo                         | [47] |
| NDUFA1         | T lymphocytes, CD4+          | 77, 108                    | 1< E-05       | 10.1621/ISZJ58eZyg                         | [49] |
|                | B lymphocytes, GM12878 cells | 73                         | 1< E-05       | 10.1621/WdnDiLYKWM                         | [46] |
| NDUFS3         | Mammary gland                | 111                        | 1< E-05       | 10.1621/w9eiy79IrX                         | [48] |
| PYGB           | Mammary gland                | 158                        | 1< E-05       | 10.1621/w9eiy79IrX                         | [48] |
| OGDH           | Fibroblasts, MEFs            | 101                        | 1< E-05       | 10.1621/xXhMIGXpPo                         | [47] |
|                |                              |                            |               |                                            |      |
| MFN2           | Fibroblasts, MEFs            | 103                        | 1< E-05       | 10.1621/xXhMIGXpPo                         | [47] |
|                | Mammary gland                | 135                        | 1< E-05       | 10.1621/w9eiy79IrX                         | [48] |
|                | T lymphocytes, CD4+          | 149                        | 1< E-05       | 10.1621/ISZJ58eZyg                         | [49] |
| GNA12          | B lymphocytes, GM12878 cells | 150                        | 1< E-05       | 10.1621/WdnDiLYKWM                         | [46] |
|                | myeloblasts, K562 cells      | 446                        | 1< E-05       | 10.1621/WdnDiLYKWM                         | [46] |
| GYS1           | Fibroblasts, MEFs            | 138                        | 1< E-05       | 10.1621/xXhMIGXpPo                         | [47] |
| SCN5A          | Mammary gland                | 224                        | 1< E-05       | 10.1621/w9eiy79IrX                         | [48] |
| PER1           | Mammary gland                | 102, 208, 252, 277,329,468 | 1< E-05       | 10.1621/w9eiy79IrX                         | [48] |
|                | Fibroblasts, MEFs            | 98                         | 1< E-05       | 10.1621/xXhMIGXpPo                         | [47] |
| SLC6A6         | myeloblasts, K562 cells      | 121                        | 1< E-05       | 10.1621/WdnDiLYKWM                         | [46] |
|                | Fibroblasts, MEFs            | 93, 316                    | 1< E-05       | 10.1621/xXhMIGXpPo                         | [47] |

\*Signaling Pathways Project Datasets: <http://www.signalingpathways.org/index.jsf>



## References

- [1] Cao X, Tian Y, Nguyen V, et al. Spike protein of sars-cov-2 activates macrophages and contributes to induction of acute lung inflammation in male mice. *FASEB J.* 2021;35:e21801.10.1096/fj.202002742RR.
- [2] Kimura T, Mogi C, Tomura H, et al. Induction of scavenger receptor class b type i is critical for simvastatin enhancement of high-density lipoprotein-induced anti-inflammatory actions in endothelial cells. *J Immunol* 2008;181:7332-7340.10.4049/jimmunol.181.10.7332.
- [3] Lee SW, Kim SY, Moon SY, et al. Statin use and covid-19 infectivity and severity in south korea: Two population-based nationwide cohort studies. *JMIR Public Health Surveill* 2021;7:e29379.10.2196/29379.
- [4] Kollias A, Kyriakoulis KG, Kyriakoulis IG, et al. Statin use and mortality in covid-19 patients: Updated systematic review and meta-analysis. *Atherosclerosis* 2021;330:114-121.10.1016/j.atherosclerosis.2021.06.911.
- [5] Surma S, Banach M, Lewek J. Covid-19 and lipids. The role of lipid disorders and statin use in the prognosis of patients with sars-cov-2 infection. *Lipids Health Dis* 2021;20:141.10.1186/s12944-021-01563-0.
- [6] Pawlos A, Niedzielski M, Gorzelak-Pabis P, et al. Covid-19: Direct and indirect mechanisms of statins. *Int J Mol Sci* 2021;22.10.3390/ijms22084177.
- [7] Reiner Z, Hatamipour M, Banach M, et al. Statins and the covid-19 main protease: In silico evidence on direct interaction. *Arch Med Sci* 2020;16:490-496.10.5114/aoms.2020.94655.
- [8] Cariou B, Goronflot T, Rimbart A, et al. Routine use of statins and increased covid-19 related mortality in inpatients with type 2 diabetes: Results from the coronado study. *Diabetes Metab* 2021;47:101202.10.1016/j.diabet.2020.10.001.
- [9] Raman B, Bluemke DA, Luscher TF, et al. Long covid: Post-acute sequelae of covid-19 with a cardiovascular focus. *Eur. Heart J.* 2022;43:1157-1172.10.1093/eurheartj/ehac031.
- [10] Lindner D, Fitzek A, Brauning H, et al. Association of cardiac infection with sars-cov-2 in confirmed covid-19 autopsy cases. *JAMA Cardiol* 2020;5:1281-1285.10.1001/jamacardio.2020.3551.
- [11] Vrints CJM, Krychtiuk KA, Van Craenenbroeck EM, et al. Endothelialitis plays a central role in the pathophysiology of severe covid-19 and its cardiovascular complications. *Acta Cardiol.* 2021;76:109-124.10.1080/00015385.2020.1846921.
- [12] Robinson FA, Mihealsick RP, Wagener BM, et al. Role of angiotensin-converting enzyme 2 and pericytes in cardiac complications of covid-19 infection. *Am J Physiol Heart Circ Physiol* 2020;319:H1059-H1068.10.1152/ajpheart.00681.2020.
- [13] Daems M, Liesenborghs L, Cuijpers I, et al. Sars-cov-2 infection leads to cardiac pericyte loss, fibrosis, cardiomyocyte hypertrophy, and diastolic dysfunction. *Researchsquare.com* 2020.10.21203/rs.3.rs-105963/v1.
- [14] Avolio E, Carrabba M, Milligan R, et al. The sars-cov-2 spike protein disrupts human cardiac pericytes function through cd147 receptor-mediated signalling: A potential non-infective mechanism of covid-19 microvascular disease. *Clin. Sci. (Lond.)* 2021;135:2667-2689.10.1042/CS20210735.
- [15] Guzik TJ, Mohiddin SA, Dimarco A, et al. Covid-19 and the cardiovascular system: Implications for risk assessment, diagnosis, and treatment options. *Cardiovasc. Res.* 2020;116:1666-1687.10.1093/cvr/cvaa106.
- [16] Wang EY, Mao T, Klein J, et al. Diverse functional autoantibodies in patients with covid-19. *Nature* 2021;595:283-288.10.1038/s41586-021-03631-y.
- [17] Cuthbertson DJ, Steele T, Wilding JP, et al. What have human experimental overfeeding studies taught us about adipose tissue expansion and susceptibility to obesity and metabolic complications? *Int J Obes (Lond)* 2017;41:853-865.10.1038/ijo.2017.4.
- [18] Mizunoe Y, Kobayashi M, Tagawa R, et al. Association between lysosomal dysfunction and obesity-related pathology: A key knowledge to prevent metabolic syndrome. *Int J Mol Sci* 2019;20.10.3390/ijms20153688.
- [19] Hamazaki J, Murata S. Er-resident transcription factor nrf1 regulates proteasome expression and beyond. *Int J Mol Sci* 2020;21.10.3390/ijms21103683.
- [20] Yamamoto S, Ogasawara N, Yamamoto K, et al. Mitochondrial proteins nip-snap-1 and -2 are a target for the immunomodulatory activity of clarithromycin, which involves nf-kappab-mediated cytokine production. *Biochem Biophys Res Commun* 2017;483:911-916.10.1016/j.bbrc.2016.12.100.
- [21] McLelland GL, Fon EA. Mfn2 retrotranslocation boosts mitophagy by uncoupling mitochondria from the er. *Autophagy* 2018;14:1658-1660.10.1080/15548627.2018.1505154.
- [22] Yap ZY, Efthymiou S, Seiffert S, et al. Bi-allelic variants in ogdhl cause a neurodevelopmental spectrum disease featuring epilepsy, hearing loss, visual impairment, and ataxia. *Am. J. Hum. Genet.* 2021;108:2368-2384.10.1016/j.ajhg.2021.11.003.

- [23] Mathieu C, Li de la Sierra-Gallay I, Duval R, et al. Insights into brain glycogen metabolism: The structure of human brain glycogen phosphorylase. *J. Biol. Chem.* 2016;291:18072-18083.10.1074/jbc.M116.738898.
- [24] Wende AR, Brahma MK, McGinnis GR, et al. Metabolic origins of heart failure. *JACC Basic Transl Sci* 2017;2:297-310.10.1016/j.jacbts.2016.11.009.
- [25] Tran DH, Wang ZV. Glucose metabolism in cardiac hypertrophy and heart failure. *J Am Heart Assoc* 2019;8:e012673.10.1161/JAHA.119.012673.
- [26] Wilde AAM, Amin AS. Clinical spectrum of scn5a mutations: Long qt syndrome, brugada syndrome, and cardiomyopathy. *JACC Clin Electrophysiol* 2018;4:569-579.10.1016/j.jacep.2018.03.006.
- [27] Ansar M, Ranza E, Shetty M, et al. Taurine treatment of retinal degeneration and cardiomyopathy in a consanguineous family with slc6a6 taurine transporter deficiency. *Hum. Mol. Genet.* 2020;29:618-623.10.1093/hmg/ddz303.
- [28] Lindstrom S, Wang L, Smith EN, et al. Genomic and transcriptomic association studies identify 16 novel susceptibility loci for venous thromboembolism. *Blood* 2019;134:1645-1657.10.1182/blood.2019000435.
- [29] Jesus ICG, Araujo FM, Mesquita T, et al. Molecular basis of period 1 regulation by adrenergic signaling in the heart. *FASEB J.* 2021;35:e21886.10.1096/fj.202100441R.
- [30] Davidson AJ, London B, Block GD, et al. Cardiovascular tissues contain independent circadian clocks. *Clin. Exp. Hypertens.* 2005;27:307-311.
- [31] Leibetseder V, Humpeler S, Svoboda M, et al. Clock genes display rhythmic expression in human hearts. *Chronobiol. Int.* 2009;26:621-636.10.1080/07420520902924939.
- [32] Rykaczewska U, Suur BE, Rohl S, et al. Pcsk6 is a key protease in the control of smooth muscle cell function in vascular remodeling. *Circ. Res.* 2020;126:571-585.10.1161/CIRCRESAHA.119.316063.
- [33] Waudby-West R, Parcell BJ, Palmer CNA, et al. The association between sars-cov-2 rt-pcr cycle threshold and mortality in a community cohort. *Eur. Respir. J.* 2021;58.10.1183/13993003.00360-2021.
- [34] Whitaker M, Elliott J, Chadeau-Hyam M, et al. Persistent covid-19 symptoms in a community study of 606,434 people in england. *Nat Commun* 2022;13:1957.10.1038/s41467-022-29521-z.
- [35] Heubner L, Petrick PL, Guldner A, et al. Extreme obesity is a strong predictor for in-hospital mortality and the prevalence of long-covid in severe covid-19 patients with acute respiratory distress syndrome. *Sci. Rep.* 2022;12:18418.10.1038/s41598-022-22107-1.
- [36] Valenzuela G, Alarcon-Andrade G, Schulze-Schiapacasse C, et al. Short-term complications and post-acute sequelae in hospitalized paediatric patients with covid-19 and obesity: A multicenter cohort study. *Pediatr. Obes.* 2022:e12980.10.1111/ijpo.12980.
- [37] Carfi A, Bernabei R, Landi F, et al. Persistent symptoms in patients after acute covid-19. *JAMA* 2020;324:603-605.10.1001/jama.2020.12603.
- [38] Diez-Fuertes F, Iglesias-Caballero M, Garcia-Perez J, et al. A founder effect led early sars-cov-2 transmission in spain. *J. Virol.* 2021;95.10.1128/JVI.01583-20.
- [39] Fernandez-de-Las-Penas C, Cancela-Celleruelo I, Rodriguez-Jimenez J, et al. Associated-onset symptoms and post-covid-19 symptoms in hospitalized covid-19 survivors infected with wuhan, alpha or delta sars-cov-2 variant. *Pathogens* 2022;11.10.3390/pathogens11070725.
- [40] Spinicci M, Graziani L, Tilli M, et al. Infection with sars-cov-2 variants is associated with different long covid phenotypes. *Viruses* 2022;14.10.3390/v14112367.
- [41] Antonelli M, Pujol JC, Spector TD, et al. Risk of long covid associated with delta versus omicron variants of sars-cov-2. *Lancet* 2022;399:2263-2264.10.1016/S0140-6736(22)00941-2.
- [42] Lopez-Cortes GI, Palacios-Perez M, Velez HF, et al. The spike protein of sars-cov-2 is adapting because of selective pressures. *Vaccines (Basel)* 2022;10.10.3390/vaccines10060864.
- [43] Wang C, Liu B, Zhang S, et al. Differences in incidence and fatality of covid-19 by sars-cov-2 omicron variant versus delta variant in relation to vaccine coverage: A world-wide review. *J. Med. Virol.* 2022.10.1002/jmv.28118.
- [44] Boglione L, Meli G, Poletti F, et al. Risk factors and incidence of long-covid syndrome in hospitalized patients: Does remdesivir have a protective effect? *QJM* 2022;114:865-871.10.1093/qjmed/hcab297.
- [45] Ayoubkhani D, Bermingham C, Pouwels KB, et al. Trajectory of long covid symptoms after covid-19 vaccination: Community based cohort study. *BMJ* 2022;377:e069676.10.1136/bmj-2021-069676.
- [46] Gertz J, Savic D, Varley KE, et al. Distinct properties of cell-type-specific and shared transcription factor binding sites. *Mol Cell* 2013;52:25-36.10.1016/j.molcel.2013.08.037.

- [47] Zhu BM, Kang K, Yu JH, et al. Genome-wide analyses reveal the extent of opportunistic stat5 binding that does not yield transcriptional activation of neighboring genes. *Nucleic Acids Res* 2012;40:4461-4472.10.1093/nar/gks056.
- [48] Shin HY, Willi M, HyunYoo K, et al. Hierarchy within the mammary stat5-driven wap super-enhancer. *Nat Genet* 2016;48:904-911.10.1038/ng.3606.
- [49] Villarino A, Laurence A, Robinson GW, et al. Signal transducer and activator of transcription 5 (stat5) paralog dose governs t cell effector and regulatory functions. *Elife* 2016;5.10.7554/eLife.08384.
